# Supplementary material for: Complement activity is regulated in C3 glomerulopathy by IgG–factor H fusion proteins with and without properdin targeting domains
Source: PubMed Central journal article supplement (PMC7863913; doi:10.1016/j.kint.2020.09.028), 2021-02
Supplement: mmc1.pdf [file mmc1.pdf]

TITLE:

Complement regulation in C3 glomerulopathy by IgG-factor H fusion proteins with and without properdin targeting domains

AUTHORS:

Alyssa C. Gilmore<sup>1</sup>, Yuchun Zhang<sup>2</sup>, Deborah P. Lavin<sup>1</sup>, Suresh Katti<sup>2</sup>, Yi Wang<sup>2</sup>, Krista Johnson<sup>2</sup>, SungKwon Kim<sup>2</sup>, Matthew C. Pickering<sup>1</sup>

<sup>1</sup>Centre for Inflammatory Disease, Imperial College London, UK;

<sup>2</sup>Alexion Pharmaceuticals, New Haven, US

Gilmore et al Supplemental Data

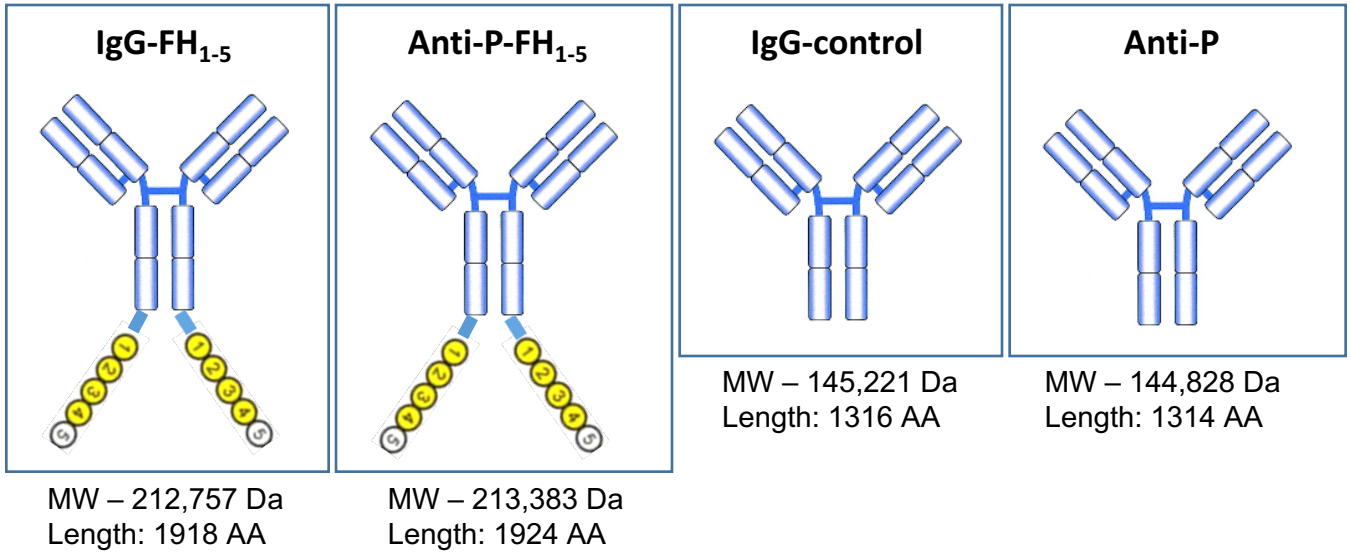

**Supplemental Figure 1. Fusion proteins used in this study.** IgG-FH<sub>1-5</sub> contains the first five domains of mouse factor H (FH<sub>1-5</sub>) linked to a non-targeting mouse immunoglobulin. Anti-P-FH<sub>1-5</sub> consists of mFH<sub>1-5</sub> linked to a neutralising mouse anti-mouse properdin antibody (Anti-P, see Miwa T et al., J Immunol, 190: 3552-3559, 2013). Controls proteins included an isotype-matched non-targeting mouse immunoglobulin (IgG-control) and the neutralising mouse anti-mouse properdin antibody (Anti-P). MW – molecular weight; AA – amino acids; Da – Daltons.

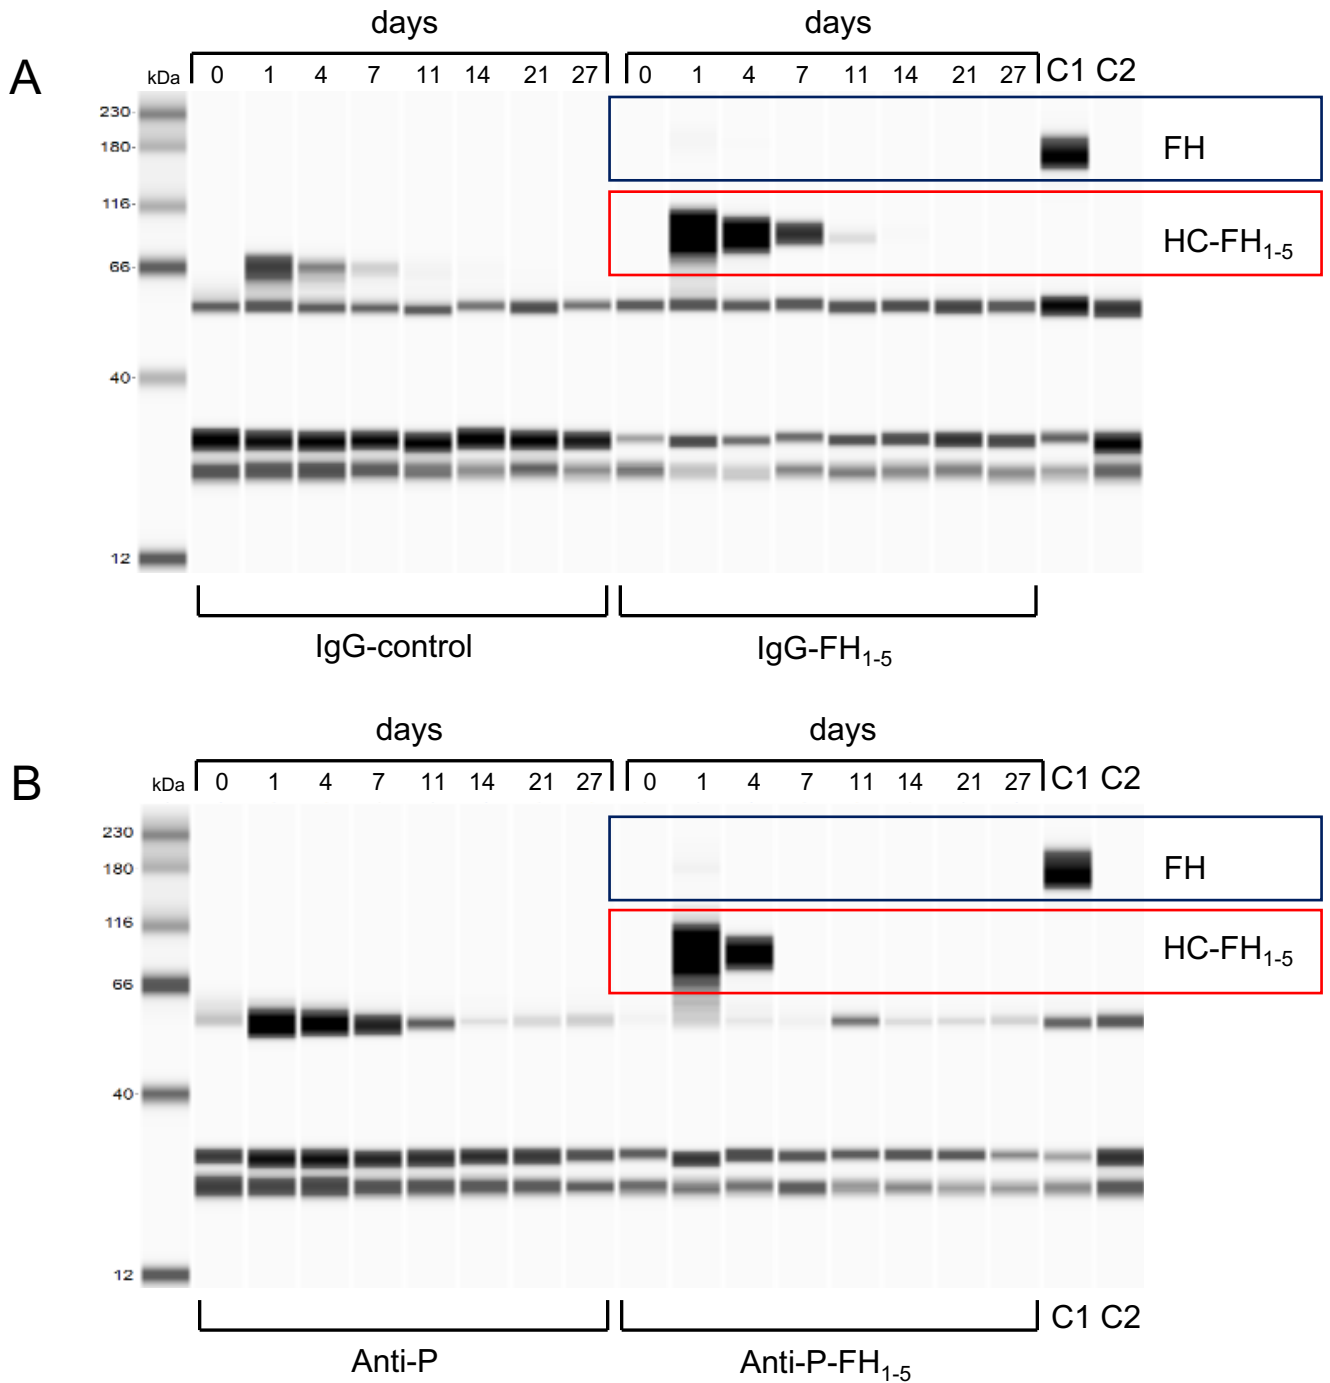

**Supplemental Figure 2. WES blot analysis to detect FH<sub>1-5</sub> in plasma samples from FH-deficient mice injected with either (A) IgG-FH<sub>1-5</sub> or (B) Anti-P-FH<sub>1-5</sub>.** The 94kDa immunoglobulin heavy chain linked to mouse FH<sub>1-5</sub> (HC-FH<sub>1-5</sub>) is detectable up to 11 days after injection of IgG-FH<sub>1-5</sub> and up to 4 days after injection of Anti-P-FH<sub>1-5</sub> protein (red boxes). Controls included plasma from wild-type mice where the full length factor H protein is detected (FH, black boxes, lane C1) and non-injected FH-deficient mice, where no FH is evident (lane C2, black boxes). As expected, neither FH nor FH<sub>1-5</sub> is detectable in plasma samples from mice injected with Anti-P or IgG-control.

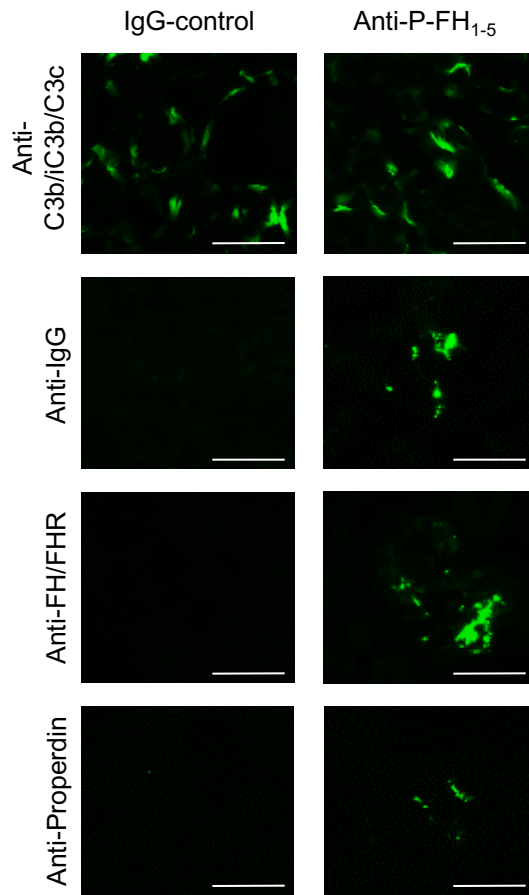

**Supplemental Figure 3. Glomerular complement immunostaining 96 hours following injection of IgG-control or Anti-P-FH<sub>1-5</sub> in wild-type mice** Representative glomerular images are shown. FH/FHR – Factor H/Factor H-related proteins. Bar 100 microns.

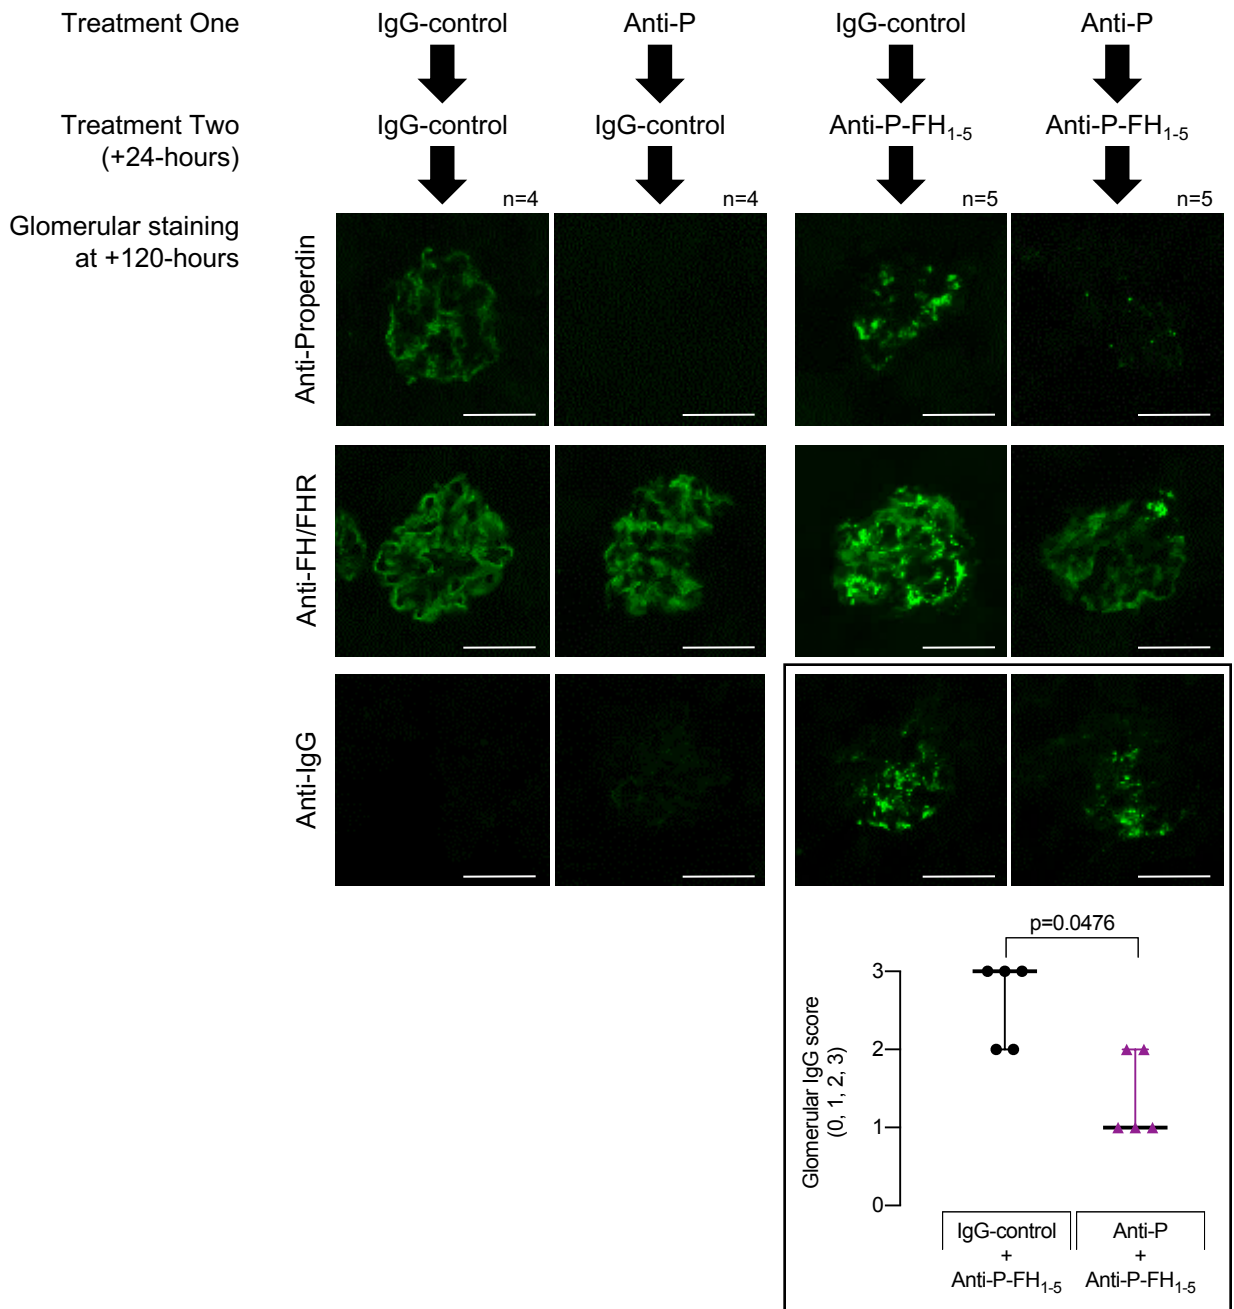

**Supplemental Figure 4. The role of properdin (P) on the deposition of Anti-P-FH<sub>1-5</sub> in glomeruli of FH-deficient mice.** *Cfh*<sup>-/-</sup> mice were injected with either IgG-control or Anti-P (Treatment One) followed 24-hours later by either IgG-control or Anti-P-FH<sub>1-5</sub> (Treatment Two). Animals were culled 120-hours after treatment one and glomerular staining for IgG, P and FH/FHR was assessed. Representative images are shown. Anti-P injection markedly reduced P (row one, column two) but not FH/FHR (remains unchanged) or IgG (remains absent) staining. Administration of Anti-P-FH<sub>1-5</sub> 24-hours after IgG-control resulted in the appearance of granular staining with anti-IgG, anti-FH/FHR and anti-Propertdin antibodies as seen following injection of Anti-P-FH<sub>1-5</sub> alone (See Figure 3B). This granular staining reduced when Anti-P-FH<sub>1-5</sub> injection was preceded by Anti-P injection which depletes both circulating (See Figure 1H) and glomerular (See Figure 3B) P. Glomerular staining with anti-IgG was only evident in mice injected with Anti-P-FH<sub>1-5</sub> (row three, columns 3 and 4) and was significantly lower in mice that received Anti-P-FH<sub>1-5</sub> preceded by anti-P. We concluded that the deposition of Anti-P-FH<sub>1-5</sub> in glomeruli of *Cfh*<sup>-/-</sup> mice was partly dependent on P. Horizontal bars denote median values and whiskers denote interquartile range. P value derived from Mann Whitney test. Bar 100 microns.
